# Supplementary material
Source: MDPI journal article supplement (https://www.mdpi.com/1996-1073/15/15/5574)
Supplement: s1 [file s1]

## Supplementary Materials

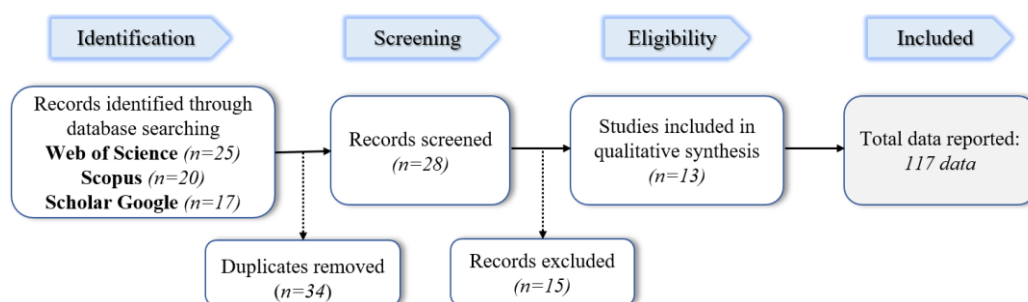

**Figure S1.** Flow diagram summarizing quantitatively the selection of studies from the systematic review following the Preferred Reporting Items for Systematic Reviews and Meta-analyses (PRISMA, <http://www.prisma-statement.org/>). n= number of articles

**Table S1.** Global production of fiber waste from the textile industry and volatile solids (VS) and total solids (TS) content.

| Parameters                    | Fiber waste |        | unit                    |
|-------------------------------|-------------|--------|-------------------------|
|                               | Polyester   | Cotton |                         |
| <b>World waste production</b> | 42          | 11,7   | million tonnes per year |
| <b>VS%</b>                    | 99,4        | 79     | %TS                     |
| <b>TS%</b>                    | 97,5        | 98,7   | %                       |

**Table S2.** Summary of raw data from studies used to perform meta-analysis of evaluation of pre-treatments applied to different sources of textile waste.

|            | Textile Waste                      | Reactor conditions                                 | Pretreatment conditions                                         | CH <sub>4</sub> Yield (mL/g) <sup>3</sup> |                   |            | Reference |
|------------|------------------------------------|----------------------------------------------------|-----------------------------------------------------------------|-------------------------------------------|-------------------|------------|-----------|
|            |                                    |                                                    |                                                                 | Average Control                           | Average Pretrated | Change (%) |           |
| Biological |                                    |                                                    |                                                                 |                                           |                   |            |           |
|            | Wool textile <sup>1</sup>          | Batch; 37°C; 50 days;                              | Alkaline Endopeptidase (Kilo Novo Protease Unit)                | 43,5                                      | 78                | 79         | [1]       |
|            | Wool textile <sup>1</sup>          | Batch; 55°C; 46 days;                              | Alkaline Endopeptidase (Kilo Novo Protease Unit)                | 19,5                                      | 300               | 1438       | [2]       |
| Chemical   |                                    |                                                    |                                                                 |                                           |                   |            |           |
|            | Wool textile <sup>1</sup>          | Batch; 37°C; 50 days;                              | Inorganic macronutrients + trace nutrients                      | 43,5                                      | 62                | 42         | [1]       |
|            | Blue jeans <sup>1</sup>            | CSTR – UASB; 55°C – 24°C; 30 days;                 | N-methyl- morpholine-N-oxide (NMMO) soluion concentrated to 85% | 179,1                                     | 250,5             | 40         | [8]       |
|            | Cotton Waste <sup>1</sup>          | Batch; 38°C;                                       | Microaeration [Oxygen Flow Rates (OFR): 0.5 – 4.6 mL/h]         | 653,3                                     | 197,3             | -70        | [6]       |
|            | Cotton Waste <sup>1</sup>          | Batch; 38°C; 30 days                               | Microaeration [OFR: 0.5 – 4.6 mL/h]                             | 653,3                                     | 160,4             | -75        | [10]      |
|            | Textile dyeing sludge <sup>2</sup> | 35°C; 15 days;                                     | NaOH [pH 10]                                                    | 0,1                                       | 33,3              | 33200      | [4]       |
|            | Textile dyeing sludge <sup>2</sup> | 35°C; 15 days;                                     | HCl [pH 2]                                                      | 0,1                                       | 21,1              | 21000      | [4]       |
|            | Fresh biosludge                    | Batch; 35°C; 30 days;                              | Ozonization [0.005 – 0.01 g O <sub>3</sub> /g COD]              | 246                                       | 286,5             | 16         | [7]       |
| Physical   |                                    |                                                    |                                                                 |                                           |                   |            |           |
|            | Wool textile <sup>1</sup>          | Batch; 55°C; 46 days                               | Autoclave [120°C for 10 min]                                    | 19,5                                      | 130               | 567        | [2]       |
|            | Wool textile <sup>1</sup>          |                                                    | Liquid Nitrogen (LN <sub>2</sub> )                              | 34                                        | 129,7             | 281        | [9]       |
|            | Cotton Waste <sup>1</sup>          | Semicontinuous anaerobic digesters; 37°C; 40 days; | Autoclave [120°C for 10 min]                                    | 157,5                                     | 203,9             | 29         | [3]       |
|            | Textile dyeing sludge <sup>2</sup> | 35°C; 15 days;                                     | Thermal [water bathing at 70°C for 10h]                         | 0,1                                       | 56,1              | 56000      | [4]       |

|                                        |                                                    |                                                                      |       |       |       |      |
|----------------------------------------|----------------------------------------------------|----------------------------------------------------------------------|-------|-------|-------|------|
| Textile dyeing sludge <sup>2</sup>     | Batch; 35°C; 23 days;                              | Thermal [60°C – 100°C]                                               | 82,1  | 169,1 | 106   | [5]  |
| Fresh biosludge <sup>2</sup>           | Batch; 35°C; 30 days;                              | Sonication [51 kHz±6% frequency, 120 watts 30 – 60min]               | 246   | 278,5 | 13    | [7]  |
| Textile dyeing sludge <sup>2</sup>     |                                                    | Sonication [4 kHz, 255 W, 0.73 W/mL and 15 min]                      | 113   | 125   | 10    | [11] |
| Textile dyeing wastewater <sup>2</sup> | Batch; 37°C;                                       | UV photodegradation                                                  | 8,9   | 15,5  | 74    | [12] |
| Textile dyeing sludge <sup>2</sup>     | Batch; 35°C; 25 days;                              | 90°C for 1h                                                          | 288,9 | 347,7 | 20    | [13] |
| <b>Chemical+Physical</b>               |                                                    |                                                                      |       |       |       |      |
| Cotton Waste <sup>1</sup>              | Semicontinuous anaerobic digesters; 37°C; 40 days; | [Na <sub>2</sub> CO <sub>3</sub> + 150°C 120 min]                    | 157,5 | 253,8 | 61    | [3]  |
| Textile dyeing sludge <sup>2</sup>     | 35°C; 15 days;                                     | Thermal [water bathing at 90°C for 10h + NaOH]                       | 0,1   | 23,6  | 23500 | [4]  |
| Cotton Waste <sup>1</sup>              | Batch; 38°C; 30 days;                              | Microaeration [OFR: 1.0 – 4.6 mL/h+ H <sub>2</sub> SO <sub>4</sub> ] | 653,3 | 246,6 | -62   | [10] |

1 Solid Fraction

2 Liquid Fraction

3 mL/gVS or mL/gCOD

Reference number of the article in Table S3 shown in square brackets.

**Table S3.** Studies included in the meta-analysis.

| n  | Article Title                                                                                                                        | Authors                                                                         | Year | DOI                            |
|----|--------------------------------------------------------------------------------------------------------------------------------------|---------------------------------------------------------------------------------|------|--------------------------------|
| 1  | Dry anaerobic digestion of lignocellulosic and protein residues                                                                      | Kabir, M.M., Taherzadeh, M.J., Sárvári Horváth, I.                              | 2015 | 10.18331/BRJ2015.2.4.5         |
| 2  | Enhanced methane production from wool textile residues by thermal and enzymatic pretreatment                                         | Kabir, MM; Forgacs, G; Horvath, IS                                              | 2013 | 10.1016/j.procbio.2013.02.029  |
| 3  | Enhancing energy production from waste textile by hydrolysis of synthetic parts                                                      | Hasanzadeh, E; Mirmohamadsadeghi, S; Karimi, K                                  | 2018 | 10.1016/j.fuel.2018.01.035     |
| 4  | Anaerobic digestion of recalcitrant textile dyeing sludge with alternative pretreatment strategies                                   | Xiang, X., Chen, X., Dai, R., Luo, Y., Ma, P., Ni, S., Ma, C.                   | 2016 | 10.1016/j.biortech.2016.09.098 |
| 5  | Effect of low temperature of thermal pretreatment on anaerobic digestion of textile dyeing sludge                                    | Chen, X., Xiang, X., Dai, R., Wang, Y., Ma, P                                   | 2017 | 10.1016/j.biortech.2017.06.138 |
| 6  | Rapid hydrogen generation from cotton wastes by mean of dark fermentation                                                            | Solowski, G; Konkol, I; Shalaby, M; Cenian, A                                   | 2020 | 10.1007/s42452-020-03247-3     |
| 7  | Effect of Ozonation and Sonication on Biochemical Methane Potential of Biosludge from Textile Mill Effluent                          | Desiana, D., Setiadi, T.                                                        | 2009 | 10.1007/s11267-009-9239-5      |
| 8  | High-rate biogas production from waste textiles using a two-stage process                                                            | Jeihanipour, A; Aslanzadeh, S; Rajendran, K; Balasubramanian, G; Taherzadeh, MJ | 2013 | 10.1016/j.renene.2012.10.042   |
| 9  | Effect of liquid nitrogen pre-treatment on various types of wool waste fibres for biogas production                                  | Kuzmanova, E., Zhelev, N., & Akunna, J. C.                                      | 2018 | 10.1016/j.heliyon.2018.e00619  |
| 10 | Methane and hydrogen production from cotton waste by dark fermentation under anaerobic and micro -aerobic conditions                 | Solowski, G; Konkol, I; Cenian, A                                               | 2020 | 10.1007/978-3-030-13068-8_71   |
| 11 | Co-digestion Potential of Industrial Sludges with Municipal Sludge                                                                   | Aksu Bahçeci, H., Sanin, S.L., Sanin, F.D.                                      | 2021 | 10.1007/s12649-021-01409-x     |
| 12 | Integrated UV photodegradation and anaerobic digestion of textile dye for efficient biogas production using zeolite                  | Apollo, S., Onyango, M.S., Ochieng, A.                                          | 2014 | 10.1016/j.cej.2014.02.027      |
| 13 | Optimization and system energy balance analysis of anaerobic co-digestion process of pretreated textile dyeing sludge and food waste | Zhou, WZ; Tuersun, N; Zhang, YZ; Wang, Y; Cheng, C; Chen, XG                    | 2021 | 10.1016/j.jece.2021.106855     |
